# Supplementary material for: Synthesis of ZnO nanorods on a flexible Phynox alloy substrate: influence of growth temperature on their properties
Source: Royal Society of Chemistry journal article supplement (doi:10.1039/c5ra12773d), 2015-01-01
Supplement: c5ra12773d1.pdf [file c5ra12773d1.pdf]

Supplementary information:

S1:

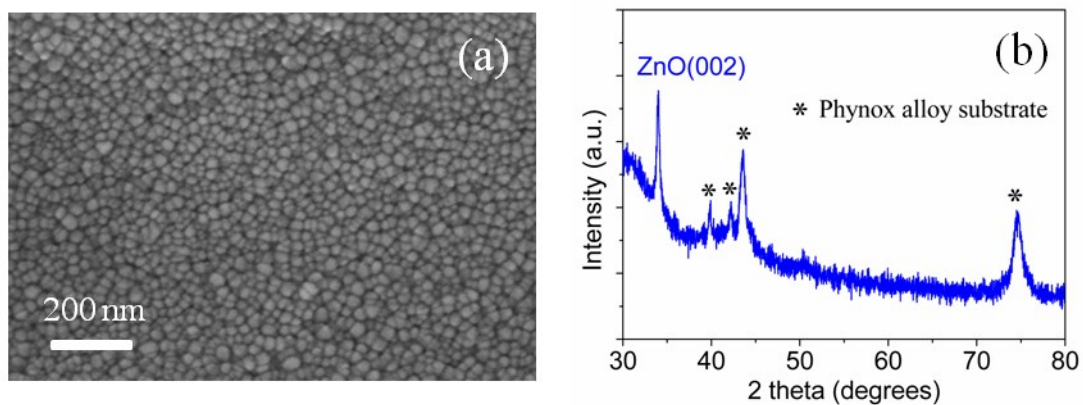

Fig.S1: (a). FE-SEM image of ZnO seeds on the Phynox alloy substrate (b). Corresponding XRD pattern.

Table S1: Chemical composition (weight %) of Phynox alloy.

| Chemical composition (weight %) of Phynox alloy |       |       |       |         |         |      |       |        |        |        |
|-------------------------------------------------|-------|-------|-------|---------|---------|------|-------|--------|--------|--------|
| Fe                                              | Co    | Cr    | Ni    | Mo      | Mn      | Si   | C     | P      | S      | Be     |
| Balance                                         | 39-41 | 19-21 | 15-16 | 6.5-7.5 | 1.5-2.0 | ≤1.2 | ≤0.15 | ≤0.015 | ≤0.015 | ≤0.001 |

Table S2: Tilt angle measurements of ZnO nanorods from FE-SEM images with respect to growth temperature.

| Growth temperature (°C) | Tilt angle1 (°) | Tilt angle2 (°) | Tilt angle3 (°) | Avg. tilt angle (°) |
|-------------------------|-----------------|-----------------|-----------------|---------------------|
| 60                      | 88.2            | 83.0            | 82.5            | 84.5                |
| 70                      | 89.2            | 88.1            | 89.7            | 89.0                |
| 80                      | 89.7            | 89.4            | 89.6            | 89.5                |
| 90                      | 89.9            | 89.7            | 89.8            | 89.8                |

Table S3: Average length and diameter of the ZnO nanorods with growth temperatures.

| Growth temperature (°C) | Avg. length (nm) | Avg. diameter (nm) | Aspect ratio |
|-------------------------|------------------|--------------------|--------------|
| 60                      | 135.30 ± 17.02   | 68.65 ± 4.32       | 1.970        |
| 70                      | 359.66 ± 23.16   | 93.70 ± 9.05       | 3.838        |
| 80                      | 859.43 ± 24.50   | 93.89 ± 13.15      | 9.153        |
| 90                      | 1304.66 ± 184.97 | 106.37 ± 12.66     | 12.265       |

S2:

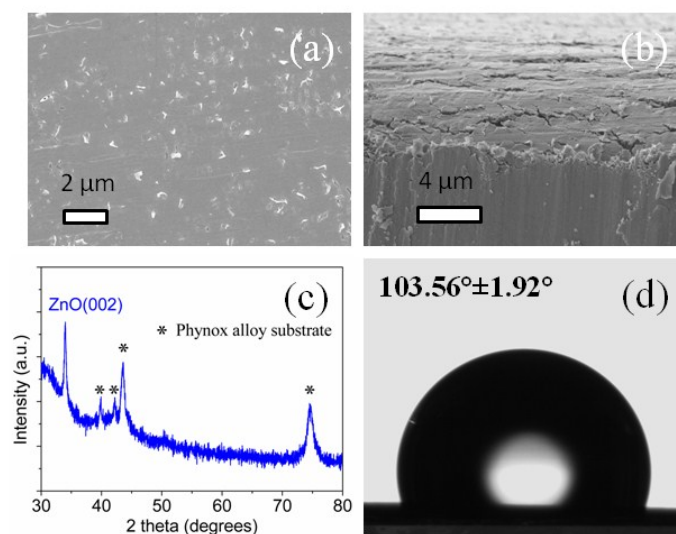

Fig.S2: (a-b). FE-SEM images of ZnO nanorods grown at 50 °C on the Phynox alloy substrate, (c). Corresponding XRD pattern, (d) WCA measurement.

S3:

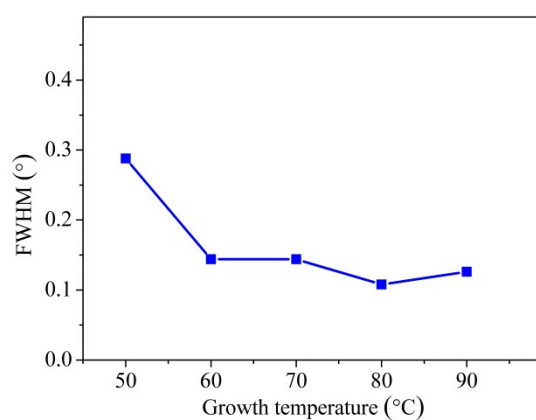

Fig.S3: Effect of growth temperature on FWHM values of as-grown ZnO nanorods.

S4:

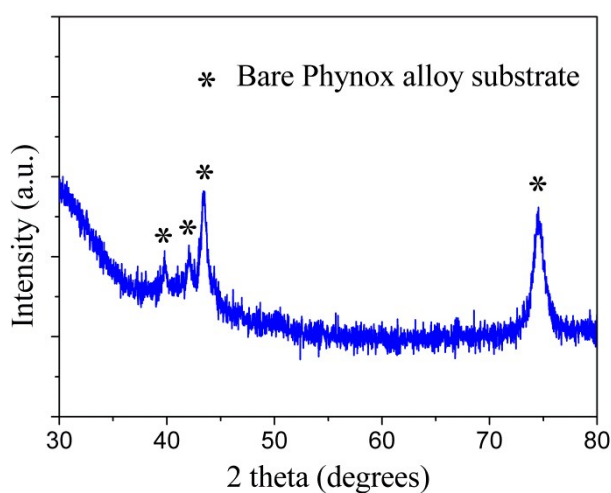

Fig.S4: XRD pattern of bare Phynox alloy substrate.

Table S4: Quantification details of as-grown ZnO nanorods.

| Element | Binding energy (eV) | FWHM (eV) | Area (a.u.) | At% (a.u.) |
|---------|---------------------|-----------|-------------|------------|
| O 1s    | 530.80              | 3.762     | 15633.73    | 39.54      |
| C 1s    | 284.80              | 3.256     | 6431.92     | 47.67      |
| Zn 2p   | 1020.80             | 3.366     | 49537.06    | 12.79      |

Table S5: WCA measurements of ZnO nanorods with growth temperatures.

| Growth Temperature (°C) | WCA1 (°) | WCA2 (°) | WCA3 (°) | Avg.WCA(°)    |
|-------------------------|----------|----------|----------|---------------|
| 50                      | 105.1    | 101.4    | 104.2    | 103.56 ± 1.92 |
| 60                      | 116.6    | 120.7    | 116.4    | 117.90 ± 2.42 |
| 70                      | 135.9    | 139.1    | 138.9    | 137.96 ± 1.79 |
| 80                      | 138.9    | 135.0    | 137.1    | 137.00 ± 1.95 |
| 90                      | 140.9    | 136.8    | 140.9    | 139.53 ± 2.36 |
